# Supplementary material for: Occupancy time in sets of states for demographic models
Source: PubMed Central journal article supplement (PMC5861321; doi:10.1016/j.tpb.2017.12.007), 2018-03
Supplement: mmc1.pdf [file mmc1.pdf]

## 815 A Appendices

816 To derive our formulae, we need to define formally the stochastic process described by the  
 817 transition matrices  $\mathbf{P}$ ,  $\mathbf{P}_{\mathbb{K}}$ ,  $\mathbf{P}_{\mathbb{C}}$ , and  $\mathbf{P}_{\mathbb{S}}$ . The Markov chain associated with the transition matrix  
 818  $\mathbf{P}$  describes a stochastic process  $\{\mathbf{X}_t\}_{t \geq 0}$  taking values in the  $i$ -state space  $\mathcal{S}$  and satisfying the  
 819 Markov property

$$820 \quad \mathbb{P}(\mathbf{X}_{t+1} = i | \mathbf{X}_t = j, \mathbf{X}_{t-1} = j_{t-1}, \dots, \mathbf{X}_0 = j_0) = p_{ji} \quad (60)$$

821 for any  $i, j, j_0, \dots, j_{t-1} \in \mathcal{S}$ . Likewise, the killed Markov chain, the conditional Markov chain,  
 822 and the sub-Markov chain describe the stochastic processes  $\{\mathbf{X}_t^{\mathbb{K}}\}_{t \geq 0}$ ,  $\{\mathbf{X}_t^{\mathbb{C}}\}_{t \geq 0}$ ,  $\{\mathbf{X}_t^{\mathbb{B}}\}_{t \geq 0}$ , which  
 823 satisfy the Markov property, respectively.

### 824 A.1 Derivation of the matrix $\mathbf{U}_{\mathbb{S}}$ and the vector $\mathbf{m}_{\mathbb{S}}$

825 Let  $i, j$  be two target states. The entry  $u_{j-\alpha, i-\alpha}^{\mathbb{S}}$  is the probability that an individual initially in  
 826 target state  $j$  to reach the state  $i$  without passing by any other states in  $\mathcal{B}$ . Define the stopping  
 827 time  $T = \min\{t \geq 1 | \mathbf{X}_t \in \mathcal{B}\}$ . The time  $T$  is the random time — possibly infinite — at which  
 828 the individual will enter the set  $\mathcal{B}$ . In particular,  $\mathbf{X}_T$  is the state through which the individual  
 829 enters for its first time in  $\mathcal{B}$ . Then we can rewrite  $u_{j-\alpha, i-\alpha}^{\mathbb{S}}$  as

$$830 \quad u_{j-\alpha, i-\alpha}^{\mathbb{S}} = \mathbb{P}_i(\mathbf{X}_T = j). \quad (61)$$

831 By definition of the absorbing probabilities (eqn. 11), for a non target state  $k \in \mathcal{B}^c$ , we have

$$832 \quad a_{j-\alpha, k} = \mathbb{P}_k(\mathbf{X}_T = j). \quad (62)$$

833 Using the Chapman-Kolmogorov equation (see e.g., [Meyn and Tweedie \[2009\]](#)), we obtain

$$\begin{aligned} \mathbb{P}_i(\mathbf{X}_T = j) &= \mathbb{P}_i(\mathbf{X}_1 = j) + \sum_{k \in \mathcal{B}^c} \mathbb{P}_i(\mathbf{X}_T = j | \mathbf{X}_1 = k) \mathbb{P}_i(\mathbf{X}_1 = k) \\ &= \mathbb{P}_i(\mathbf{X}_1 = j) + \sum_{k \in \mathcal{B}^c} \mathbb{P}_k(\mathbf{X}_T = j) \mathbb{P}_i(\mathbf{X}_1 = k) \\ &= \mathbb{P}_i(\mathbf{X}_1 = j) + \sum_{k \in \mathcal{B}^c} a_{\alpha-j, k} \mathbb{P}_i(\mathbf{X}_1 = k) \\ &= u_{ji} + \sum_{k \in \mathcal{B}^c} a_{\alpha-j, k} u_{ki}. \end{aligned} \quad (63)$$

834 In matrix notation, equation (63) is equivalent to equation (18), i.e.

$$835 \quad \mathbf{U}_{\mathcal{S}} = \mathbf{A}\mathbf{L} + \mathbf{Q} \quad (64)$$

836 where the matrices  $\mathbf{L}$  and  $\mathbf{Q}$  are extracted from the matrix  $\mathbf{U}$ , as in equation (7).

## 837 **A.2 Proof that $\mathbf{X}_{\mathcal{C}}$ is a Markov chain**

838 [Iosifescu \[1980\]](#) (section 3.2.9) proves that an absorbing Markov chain, with respect to the  
 839 conditional probability that it is absorbed by a specific state, is still an absorbing Markov  
 840 chain. Here, we generalise this statement to the condition that the chain is absorbed in a  
 841 specific set of states.

842 Let's define the event  $A = \{\mathbf{X}^{\mathbb{K}} \text{ is absorbed in the target set } \mathcal{B}\}$ , i.e. the killed chain is  
 843 absorbed in the target set. We consider the stochastic process  $\mathbf{X}^{\mathcal{C}}$ , living on the space  $\mathcal{T}$ ,  
 844 defined by

$$845 \quad \mathbb{P}\left(\mathbf{X}_t^{\mathcal{C}} \in B\right) = \mathbb{P}\left(\mathbf{X}_t^{\mathbb{K}} \in B|A\right) \quad (65)$$

846 for any measurable set  $B \subset \mathcal{S}$ . To ease the notation, we write  $\mathbb{P}\left(\mathbf{X}_t^{\mathbb{K}} \in B|A\right) = \mathbb{P}_A\left(\mathbf{X}_t^{\mathbb{K}} \in B\right)$ .

847 By definition, the process  $\mathbf{X}^{\mathcal{C}}$  corresponds to the killed Markov chain, where trajectories  
 848 encountering death before target states are set aside. We first prove that  $\mathbf{X}^{\mathcal{C}}$  is a Markov chain  
 849 and then we show that its transition probabilities are describe by the matrix  $\mathbf{P}_{\mathcal{C}}$  defined in  
 850 Section 3.2. As a consequence, this proves that the conditional Markov chain is indeed a Markov  
 851 chain and that it corresponds to the killed Markov chain, where trajectories encountering death  
 852 before target states are set aside.

853 To prove that  $\mathbf{X}^{\mathcal{C}}$  is a Markov chain, we only need to show that it satisfies the Markov  
 854 property, i.e.

$$855 \quad \mathbb{P}\left(\mathbf{X}_{t+1}^{\mathcal{C}} = i_{t+1} | \mathbf{X}_t^{\mathcal{C}} = i_t, \dots, \mathbf{X}_0^{\mathcal{C}} = i_0\right) = \mathbb{P}\left(\mathbf{X}_{t+1}^{\mathcal{C}} = i_{t+1} | \mathbf{X}_t^{\mathcal{C}} = i_t\right), \quad (66)$$

856 for  $(i_0, \dots, i_{t+1}) \in \mathcal{T}^{t+2}$ .

857 Fix  $(i_0, \dots, i_{t+1}) \in \mathcal{T}^{t+2}$ , and define the event  $B_s = \{\mathbf{X}_s^{\mathbb{K}} = i_s, \dots, \mathbf{X}_t^{\mathbb{K}} = i_0\}$ , for  $0 \leq s \leq t$ .

858 From the definitions of conditional probabilities and the process  $\mathbf{X}^{\mathcal{C}}$ , we have

$$859 \quad \mathbb{P}\left(\mathbf{X}_{t+1}^{\mathcal{C}} = i_{t+1} | \mathbf{X}_t^{\mathcal{C}} = i_t, \dots, \mathbf{X}_0^{\mathcal{C}} = i_0\right) = \frac{\mathbb{P}\left(\{\mathbf{X}_{t+1}^{\mathbb{K}} = i_{t+1}\} \cap B_0 \cap A\right)}{\mathbb{P}(A \cap B_0)} \quad (67)$$

860 If  $(i_0, \dots, i_t) \notin \mathcal{B}^{t+1}$ , then

$$\begin{aligned} \mathbb{P}(A \cap B_s) &= \mathbb{P}(A|B_s)\mathbb{P}(B_s) \\ &= \mathbb{P}\left(A|\mathbf{X}_t^{\mathbb{K}} = i_t\right)\mathbb{P}(B_s) \\ &= p_{i_t}^a \mathbb{P}(B_s), \end{aligned}$$

861 for any  $0 \leq s \leq t$ . The second equality is a consequence of the Markov property of the killed  
862 Markov chain, and the third equality follows from the definition of the absorbing probability  
863 vector  $\mathbf{p}_a$  (see eqn 12).

864 Similarly,

$$\mathbb{P}\left(\{\mathbf{X}_{t+1}^{\mathbb{K}} = i_{t+1}\} \cap B_s \cap A\right) = \mathbb{P}\left(\{\mathbf{X}_{t+1}^{\mathbb{K}} = i_{t+1}\} \cap A|B_s\right)\mathbb{P}(B_s) \quad (68)$$

$$= \mathbb{P}\left(\{\mathbf{X}_{t+1}^{\mathbb{K}} = i_{t+1}\} \cap A|\mathbf{X}_t^{\mathbb{K}} = i_t\right)\mathbb{P}(B_s) \quad (69)$$

$$= \mathbb{P}(B_s)\mathbb{I}_{\mathcal{B}}(i_{t+1})\mathbb{P}_{i_t}\left(\mathbf{X}_{t+1}^{\mathbb{K}} = i_{t+1}\right) \quad (70)$$

$$+ \mathbb{P}(B_s)(1 - \mathbb{I}_{\mathcal{B}}(i_{t+1}))\mathbb{P}\left(A|\mathbf{X}_{t+1}^{\mathbb{K}} = i_{t+1}\right)\mathbb{P}_{i_t}\left(\mathbf{X}_{t+1}^{\mathbb{K}} = i_{t+1}\right) \quad (71)$$

$$= \mathbb{P}(B_s)\left[\mathbb{I}_{\mathcal{B}}(i_{t+1})\mathbb{P}_{i_t}\left(\mathbf{X}_{t+1}^{\mathbb{K}} = i_{t+1}\right) + (1 - \mathbb{I}_{\mathcal{B}}(i_{t+1}))p_{i_{t+1}}^a\mathbb{P}_{i_t}\left(\mathbf{X}_{t+1}^{\mathbb{K}} = i_{t+1}\right)\right] \quad (72)$$

865 where  $\mathbb{I}_{\mathcal{B}}(k)$  equals 1 if  $k \in \mathcal{B}$  and 0 otherwise.

866 If  $i_t \in \mathcal{B}$ , then  $B_s \subset A$ , for  $0 \leq s \leq t$ , and

$$\frac{\mathbb{P}\left(\{\mathbf{X}_{t+1}^{\mathbb{K}} = i_{t+1}\} \cap B_s \cap A\right)}{\mathbb{P}(A \cap B_s)} = \frac{\mathbb{P}\left(\{\mathbf{X}_{t+1}^{\mathbb{K}} = i_{t+1}\} \cap B_s\right)}{\mathbb{P}(B_s)} \quad (73)$$

$$= \mathbb{P}\left(\mathbf{X}_{t+1}^{\mathbb{K}} = i_{t+1}|B_s\right) \quad (74)$$

$$= \mathbb{P}\left(\mathbf{X}_{t+1}^{\mathbb{K}} = i_{t+1}|\mathbf{X}_t^{\mathbb{K}} = i_t\right) \quad (75)$$

867 Equations (72) and (75) imply that the ratio on the right hand side of equation (67) does not  
868 depend on  $s$ , for  $0 \leq s \leq t$ . In particular,

$$\mathbb{P}\left(\mathbf{X}_{t+1}^{\mathbb{C}} = i_{t+1}|\mathbf{X}_t^{\mathbb{C}} = i_t, \dots, \mathbf{X}_0^{\mathbb{C}} = i_0\right) = \frac{\mathbb{P}\left(\{\mathbf{X}_{t+1}^{\mathbb{K}} = i_{t+1}\} \cap B_t \cap A\right)}{\mathbb{P}(A \cap B_t)} \quad (76)$$

$$= \mathbb{P}\left(\mathbf{X}_{t+1}^{\mathbb{C}} = i_{t+1}|\mathbf{X}_t^{\mathbb{C}} = i_t\right). \quad (77)$$

869 This prove that  $\mathbf{X}^{\mathbb{C}}$  satisfies the Markov property.

870 The transition probabilities of the Markov chain  $\mathbf{X}^{\mathbb{C}}$  follow from the equations above. For

871  $j \in \mathcal{T}$  and  $i \notin \mathcal{B}$ ,

$$872 \quad \mathbb{P}\left(\mathbf{X}_{t+1}^{\mathbb{C}} = j | \mathbf{X}_t^{\mathbb{C}} = i\right) = \frac{p_j^a p_{ji}^{\mathbb{K}}}{p_i^a}, \quad (78)$$

873 with the convention that  $p_k^a = 1$  for  $k \in \mathcal{B}$ . And we have for  $i, j \in \mathcal{B}$ ,

$$874 \quad \mathbb{P}\left(\mathbf{X}_{t+1}^{\mathbb{C}} = j | \mathbf{X}_t^{\mathbb{C}} = i\right) = 1. \quad (79)$$

875 It follows from equations (78) and (79) that the transition probabilities of the Markov chain  
876  $\mathbf{X}^{\mathbb{C}}$  are given by the matrix  $\mathbf{P}_{\mathbb{C}}$  defined in Section 3.2, i.e.

$$877 \quad \mathbf{P}_{\mathbb{C}} = \left( \begin{array}{c|c} \mathbf{U}_{\mathbb{C}} & \mathbf{0} \\ \hline \mathbf{M}_{\mathbb{C}} & \mathbf{I}_{\mathcal{B}} \end{array} \right) \quad (80)$$

878 where

$$879 \quad \mathbf{U}_{\mathbb{C}} = \mathbf{D}_a \mathbf{U}_{\mathbb{K}} \mathbf{D}_a^{-1} \quad \text{and} \quad \mathbf{M}_{\mathbb{C}} = \mathbf{K} \mathbf{D}_a^{-1}, \quad (81)$$

880 where  $\mathbf{D}_a = \text{diag}(\mathbf{p}_a)$  is a diagonal matrix with, on the diagonal, the probabilities of absorption  
881 in the target states.

### 882 A.3 Moments of occupancy times

883 To calculate the moments of the occupancy time for individuals initially outside the target set  
884  $\mathcal{B}$ , we use the strong Markov property. If the individual never enters in  $\mathcal{B}$ , then its occupancy  
885 time is zero. If it does enter in  $\mathcal{B}$ , say through the state  $j$ , then the law of its occupancy time  
886 is equal to the law of the occupancy time for an individual starting in the state  $j$ . To fix the

887 idea, consider the state  $i \in \mathcal{B}^c$ . Then

$$\begin{aligned}
\mathbb{E}(\tau_i^m) &= \sum_{\ell=1}^{\infty} \ell^m \mathbb{P}(\tau_i = \ell) \\
&= \sum_{\ell=1}^{\infty} \ell^m \left( \sum_{j \in \mathcal{B}} \mathbb{P}(\tau_i = \ell | \text{enter in } \mathcal{B} \text{ in } j) \mathbb{P}(\text{enter in } \mathcal{B} \text{ in } j) \right) \\
&= \sum_{\ell=1}^{\infty} \ell^m \left( \sum_{j \in \mathcal{B}} \mathbb{P}(\tau_j = \ell) a_{ji} \right) \\
&= \sum_{j \in \mathcal{B}} a_{ji} \sum_{\ell=1}^{\infty} \ell^m \mathbb{P}(\tau_j = \ell) \\
&= \sum_{j \in \mathcal{B}} a_{ji} \mathbb{E}(\tau_j^m), \tag{82}
\end{aligned}$$

888 where  $a_{ji}$  is the probability that the killed Markov chain, starting in state  $i$ , is absorbed by the  
889 state  $j$ , as in Section 3.1.1. In matrix notation, equation (82) is equivalent to

$$890 \quad \boldsymbol{\tau}_{\text{out}}^k = \mathbf{A}^\top \boldsymbol{\tau}_{\text{in}}^k. \tag{83}$$

#### 891 A.4 Covariance between the occupancy times in two disjoint sets

892 Here, we calculate the covariance between the occupancy time in two disjoint subsets  $\mathcal{B}_1$  and  
893  $\mathcal{B}_2$ , of the transient set  $\mathcal{T}$ . As stated in the main text, the covariance between  $\boldsymbol{\tau}_{\mathcal{B}_1}$  and  $\boldsymbol{\tau}_{\mathcal{B}_2}$  is

$$894 \quad \text{Cov}(\boldsymbol{\tau}_{\mathcal{B}_1}, \boldsymbol{\tau}_{\mathcal{B}_2}) = \mathbb{E} [(\boldsymbol{\tau}_{\mathcal{B}_1} - \boldsymbol{\tau}_{\mathcal{B}_1}^1) (\boldsymbol{\tau}_{\mathcal{B}_2} - \boldsymbol{\tau}_{\mathcal{B}_2}^1)]. \tag{84}$$

895 We rewrite the covariance between  $\boldsymbol{\tau}_{\mathcal{B}_1}$  and  $\boldsymbol{\tau}_{\mathcal{B}_2}$  in terms of their variances and the variance of  
896 their sum,

$$897 \quad \text{Cov}(\boldsymbol{\tau}_{\mathcal{B}_1}, \boldsymbol{\tau}_{\mathcal{B}_2}) = \frac{1}{2} [\text{Var}(\boldsymbol{\tau}_{\mathcal{B}_1} + \boldsymbol{\tau}_{\mathcal{B}_2}) - \text{Var}(\boldsymbol{\tau}_{\mathcal{B}_1}) - \text{Var}(\boldsymbol{\tau}_{\mathcal{B}_2})]. \tag{85}$$

898 Since the sets  $\mathcal{B}_1$  and  $\mathcal{B}_2$  are disjoint, the occupancy time in the union  $\mathcal{B}_1 \cup \mathcal{B}_2$  is the sum of  
899 the occupancy times in each of the subsets. Thus,

$$900 \quad \text{Cov}(\boldsymbol{\tau}_{\mathcal{B}_1}, \boldsymbol{\tau}_{\mathcal{B}_2}) = \frac{1}{2} [\text{Var}(\boldsymbol{\tau}_{\mathcal{B}_1 \cup \mathcal{B}_2}) - \text{Var}(\boldsymbol{\tau}_{\mathcal{B}_1}) - \text{Var}(\boldsymbol{\tau}_{\mathcal{B}_2})]. \tag{86}$$

901 The variances  $\text{Var}(\boldsymbol{\tau}_{\mathcal{B}_1 \cup \mathcal{B}_2})$ ,  $\text{Var}(\boldsymbol{\tau}_{\mathcal{B}_1})$ , and  $\text{Var}(\boldsymbol{\tau}_{\mathcal{B}_2})$  are calculated with the formulae (24) and  
902 (26) applied to the sets  $\mathcal{B}_1 \cup \mathcal{B}_2$ ,  $\mathcal{B}_1$ , and  $\mathcal{B}_2$ , respectively.

903 **A.5 One-step transition probabilities from  $\mathcal{B}$  given return**

904 Let  $w_{ij}^{\text{in}}$  be the conditional probability that an individual in target state  $\alpha + j$  moves to the  
 905 target state  $\alpha + i$ , in one time-step, given that it eventually returns to the target set. Then,

$$\begin{aligned}
 w_{ji}^{\text{in}} := \mathbb{P}_{\alpha+i}(X_1 = \alpha + j | T < \infty) &= \frac{\mathbb{P}_{\alpha+i}(X_1 = \alpha + j, T < \infty)}{\mathbb{P}_{\alpha+i}(T < \infty)} \\
 &= \frac{\mathbb{P}_{\alpha+i}(X_1 = \alpha + j)}{\mathbb{P}_{\alpha+i}(T < \infty)} \\
 &= \frac{u_{\alpha+j, \alpha+i}}{\sum_{\ell \in \mathcal{B}} u_{\ell i}^{\mathcal{B}}} \\
 &= \frac{u_{\alpha+j, \alpha+i}}{p_i^r}, \tag{87}
 \end{aligned}$$

906 where  $\mathbf{p}_r$  describes the return probabilities, as defined in equation (47). Thus,

$$907 \quad \mathbf{W}_{\text{in}} = \mathbf{Q}\mathbf{D}_r^{-1} \quad \text{of size } \beta \times \beta, \tag{88}$$

908 where  $\mathbf{D}_r = \text{diag}(\mathbf{p}_r)$  and the matrix  $\mathbf{Q}$  is extracted from the matrix  $\mathbf{U}$ , as in equation (7).

909 Let  $w_{ij}^{\text{out}}$  be the conditional probability that an individual in target state  $\alpha + j$  moves to the  
 910 non-target state  $i$ , in one time-step, given that it eventually returns to the target set. Then

$$\begin{aligned}
 w_{ji}^{\text{out}} := \mathbb{P}_{\alpha+i}(X_1 = j | T < \infty) &= \frac{\mathbb{P}_{\alpha+i}(T < \infty | X_1 = j) \mathbb{P}_{\alpha+i}(X_1 = j)}{\mathbb{P}_{\alpha+i}(T < \infty)} \\
 &= \frac{\mathbb{P}_{\alpha+i}(X_1 = j) \mathbb{P}_{\alpha+j}(T < \infty)}{\mathbb{P}_{\alpha+i}(T < \infty)} \\
 &= \frac{u_{j, \alpha+i} \sum_{\ell \in \mathcal{B}} a_{\ell j}}{\sum_{\ell \in \mathcal{B}} u_{\ell i}^{\mathcal{B}}} \\
 &= \frac{u_{j, \alpha+i} p_j^a}{p_i^r}, \tag{89}
 \end{aligned}$$

911 where the vector  $p_a$  describes the probabilities of absorption in the target states, as defined in  
 912 eqn. (11). Thus,

$$913 \quad \mathbf{W}_{\text{out}} = \mathbf{D}_a \mathbf{L} \mathbf{D}_r^{-1} \quad \text{of size } \alpha \times \beta, \tag{90}$$

914 where  $\mathbf{D}_r = \text{diag}(\mathbf{p}_r)$ ,  $\mathbf{D}_a = \text{diag}(\mathbf{p}_a)$ , and the matrix  $\mathbf{L}$  is extracted from the matrix  $\mathbf{U}$ , as in  
 915 equation (7).

916 Now, we derive the moments of  $\boldsymbol{\mu}$ , conditional on the individual returning to the target set.

917 Let  $\alpha + i$  be a target state. Then

$$\mathbb{E}[\mu_i^k | T < \infty] = \sum_{n=1}^{\infty} n^k \mathbb{P}(\mu_i = n | T < \infty) \quad (91)$$

$$= \mathbb{P}(\mu_i = 1 | T < \infty) + \sum_{n=2}^{\infty} n^k \sum_{j \in \mathcal{B}^c} \mathbb{P}(t_j^{\mathcal{B}} = n - 1) \mathbb{P}_i(X_1 = j | T < \infty) \quad (92)$$

$$= \mathbb{P}(\mu_i = 1 | T < \infty) + \sum_{j \in \mathcal{B}^c} \mathbb{P}_i(X_1 = j | T < \infty) \sum_{n=1}^{\infty} (n+1)^k \mathbb{P}(t_j^{\mathcal{B}} = n) \quad (93)$$

$$= \mathbb{P}(\mu_i = 1 | T < \infty) + \sum_{j \in \mathcal{B}^c} \mathbb{P}_i(X_1 = j | T < \infty) \sum_{n=1}^{\infty} \sum_{r=0}^k \binom{k}{r} n^r \mathbb{P}(t_j^{\mathcal{B}} = n) \quad (94)$$

$$= \mathbb{P}(\mu_i = 1 | T < \infty) + \sum_{j \in \mathcal{B}^c} \mathbb{P}_i(X_1 = j | T < \infty) \sum_{r=0}^k \binom{k}{r} t_{\mathcal{B}_j}^r \quad (95)$$

$$= 1 + \sum_{j \in \mathcal{B}^c} w_{ji}^{\text{out}} \sum_{r=1}^k \binom{k}{r} t_{\mathcal{B}_j}^r. \quad (96)$$

918 Hence, in matrix notation,

$$\mathbb{E}[\boldsymbol{\mu}^k | T < \infty] = \mathbf{1}_{\beta} + \sum_{r=1}^k \binom{k}{r} \mathbf{W}_{\text{out}}^{\top} \mathbf{t}_{\mathcal{B}}^r. \quad (97)$$

## 920 B Supplementary Material

921 **1.** Figures S1 and S2 are provided.

922 **2.** We provide the MATLAB files (see below) to carry out the calculations presented the Ex-  
923 ample.

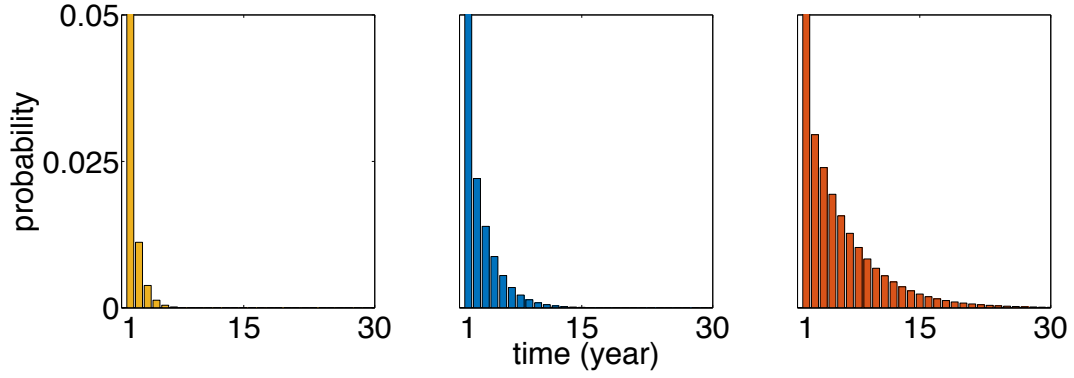

**Figure S1:** Distribution of the time required to return to the set  $\mathcal{B}_b$  for an individual initially in the state successful breeder, under favourable condition (left), ordinary condition (centre), and unfavourable condition (right). The y-axis is truncated at 0.05 to enhance the readability of the plots. The probability that the return time equals 1 is 0.983 under favorable ice conditions, 0.9403 under ordinary ice conditions, and 0.8444 under unfavorable ice conditions.

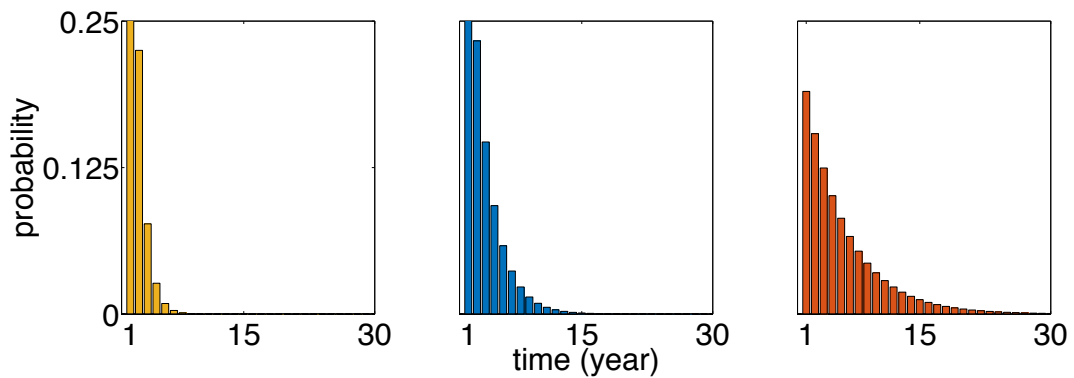

**Figure S2:** Distribution of the time required to reach the set  $\mathcal{B}_b$  for an individual initially in the state non breeder, under favourable condition (left), ordinary condition (centre), and unfavourable condition (right). The y-axis is truncated at 0.25 to enhance the readability of the plots. The probability that the reaching time equals 1 is 0.658 under favorable ice conditions, 0.37 under ordinary ice conditions, and 0.19 under unfavorable ice conditions.
