# Supplementary material for: Occupancy time in sets of states for demographic models
Source: PubMed Central journal article supplement (PMC5861321; doi:10.1016/j.tpb.2017.12.007), 2018-03
Supplement: mmc2.pdf [file mmc2.pdf]

---

`%created for use in occupancy time's paper Section Example: Southern  
%Fulmar`

`%This script provides the transition matrices U_fav, U_ord, and U_unfav for  
%favourable, ordinary, and unfavourable ice-conditions, respectively.`

`%For the original data, see  
%S. JENOUVRIER et al (2015), Ecological Monographs 85:605-624.`

`%10/04/2017`

`U_fav=[0.828,0,0,0  
0.06624,0.72912,0.62244,0.40176  
0.02576,0.18228,0.24206,0.15624  
0,0.0186,0.0455,0.342];`

`U_ord=[0.9016,0,0,0  
0.011408,0.66737,0.49312,0.1809  
0.006992,0.18823,0.24288,0.0891  
0,0.0744,0.184,0.63];`

`U_unfav=[0.9154,0,0,0  
0.002392,0.4873,0.25147,0.0468  
0.002208,0.1895,0.23213,0.0432  
0,0.2632,0.4464,0.81];`

*Published with MATLAB® R2013b*

---

```

%Created for use in the paper "Occupancy time in sets of states
%for demographic models"

%Gregory Roth and Hal Caswell
%10/04/2017

%this function calculates the results of a set analysis in a Markov chain
%demographic model.

%Given:
%
% - U          a transient matrix
% - B          a target set
%
%Returns:
%
%      %Occupancy time in the target set B
%
% - out.tau      mean
% - out.tau2     second moment
% - out.vartau   variance
% - out.cv_tau   coefficient of variation
%
%Reaching the target set B
%
% - out.p_a      probability to reach
% - out.t_B      mean time to reach
% - out.vart_B   variance of time ot reach
%
%Returning to the target set B
%
% - out.p_r      probability to return
% - out.lambda   mean time to return
% - out.varlambda variance time ot return
%
%Useful matrices
%
% - out.U_B      transient matrix of the sub MC
% - out.U_c      transient matrix of the conditional MC
% - out.U_k      transient matrix of the killed MC

%*****

function out=occ_set(U,B)
siz=size(U);
s=siz(1);          %size of U

sa=length(B);     %number of states in the target set B
st=s-sa;          %number of states in the complement of B

```

---

```

%useful vectors
es=ones(1,s);
esa=ones(1,sa);
est=ones(1,st);

%permutation vector, used to rearrange the matrix U
p=(1:s);
for i=1:sa
    p(p==B(i))=[];
end
p=[p,B];

%Rearranging the indices of the transient states such that the last
%states are the states in B
Utemp=U;
for i=1:s
    Utemp(:,i)=U(:,p(i));
end
Utemp2=Utemp;
for i=1:s
    Utemp2(i,:)=Utemp(p(i),:);
end
Uprime=Utemp2; %rearranged transition matrix

%Decomposing the transition matrix and computing useful matrices

U_k=Uprime(1:st,1:st); %transitions from B^c to B^c
K=Uprime(st+1:end,1:st);%transitions from B^c to B
L=Uprime(1:st,st+1:end);%transitions from B to B^c
Q=Uprime(st+1:end,st+1:end);%transitions from B to B

U_sub=Uprime(:,st+1:end); %transition probabilities from states in
                           %B to any states (except death)

N=inv(speye(s)-U); %fundamental matrix of the original
                   %chain (non rearranged)

%creating the killed Markov chain
%transient matrix
%U_k=U_k

%fundamental matrix
N_k=inv(eye(st)-U_k);

%Absorbtion probabilities, via the killed MC

A_k=K*N_k;           %apbsorbtion probabilities
p_a=esa*A_k;        %probabilities of abosrbtion in B

%creating the conditonal Markov chain
D_a=diag(p_a);

```

---

---

```

%transient matrix and mortality matrix
U_c=(D_a*U_k)/D_a;

%fundamental matrix
N_c=inv(speye(st)-U_c);

%creating the sub Markov chain

%transient matrix
U_B=Atilde_k*U_sub;

%fundamental matrix
N_B=inv(speye(sa)-U_B);

%computing the measures

%Occupancy time in B

tau_B=sum(N_B);
tau2_B=esa*N_B*(2*N_B-eye(sa));

tau=tau_B*Atilde_k;
tau2=tau2_B*Atilde_k;
vartau=tau2-tau.*tau;

%Reaching the subset B

t_B=est*N_c;          %mean time to reach
t2_B=est*N_c*(2*N_c-eye(st));
vart_B=t2_B-t_B.*t_B;

%Returning to the subset B

p_r=esa*U_B; %return probabilities
D_r=diag(p_r);

W_out=(D_a*L)/D_r; %conditional transition probabilities B to
                  %B^c given individual returns in B
W_in=(Q)/D_r; %conditional transition probabilities B to
              %B given individual returns in B

%return time
lambda=esa+t_B*W_out; %mean
varlambda=t2_B*W_out-(t_B*W_out).*(t_B*W_out); %variance

%rearrange the output vectors in the initial order

q=(1:s);
for i=1:s
    q(i)=find(p==i);
end

tautemp=tau;

```

---

---

```
tau2temp=tau2;
vartautemp=vartau;

for i=1:s
    tautemp(i)=tau(q(i));
    tau2temp(i)=tau2(q(i));
    vartautemp(i)=vartau(q(i));
end

%outputs

out.tau=tautemp;
out.tau2=tau2temp;
out.vartau=vartautemp;
out.cv_tau= sqrt(vartautemp)./tautemp;

out.p_a=p_a;
out.t_B=t_B;
out.vart_B=vart_B;

out.p_r=p_r;
out.lambda=lambda;
out.varlambda=varlambda;

out.U_B=U_B;
out.U_c=U_c;
out.U_k=U_k;
end
```

*Published with MATLAB® R2013b*

---

`%created for use in occupancy time's paper Section Example: Southern  
%Fulmar`

`%Gregory Roth and Hal Caswell  
%10/04/2017`

`%This code calculates the covariance and correlation between the occupancy  
%time in the target set {successful breeder, failed breeder} and the  
%longevity`

`%ATTENTION: this code uses the function abs_MC`

`%upload the transient matrix U`

`T=[1,2,3,4]; %transient set  
B=[2,3]; %target set={successful beeder, failed breeder}  
Bc=[1,4]; %complement of the target set`

`temp1=abs_MC(U,T);  
temp2=abs_MC(U,Bc);  
temp3=abs_MC(U,B);`

`%covariance between occupancy in B and Bc  
tempcov=.5*(temp1.vartau-temp2.vartau-temp3.vartau);`

`%covariance between occupancy in B and longevity  
cov=tempcov+temp3.vartau;`

`%correlation between occupancy in B and longevity (eq. 38)  
cor=cov./ (sqrt(temp1.vartau.*temp3.vartau));`

*Published with MATLAB® R2013b*
